# Supplementary material for: Hierarchical Carbon Network Composites Derived from ZIF-8 for High-Efficiency Microwave Absorption
Source: MDPI journal article supplement (doi:10.3390/ma16093380), 2023-04-26
Supplement: s1 [file s1]

# Supporting Information

## Hierarchical Carbon Network Composites Derived from ZIF-8 for High-Efficiency Microwave Absorption

Zhongyi Luo <sup>1</sup>, Zhaohao Wang <sup>2</sup>, Jinshuai Liu <sup>3,4</sup>, Huihui Jin <sup>1,\*</sup>, Chunhua Han <sup>3,4,5</sup> and Xuanpeng Wang <sup>1,4,5,\*</sup>

<sup>1</sup> Department of Physical Science & Technology, School of Science, Wuhan University of Technology, Wuhan 430070, China

<sup>2</sup> School of Chemistry and Chemical Engineering, Hubei Polytechnic University, Huangshi 435003, China

<sup>3</sup> School of Materials Science and Engineering, Wuhan University of Technology, Wuhan 430070, China

<sup>4</sup> Hainan Institute, Wuhan University of Technology, Sanya 572000, China

<sup>5</sup> Hubei Longzhong Laboratory, Wuhan University of Technology (Xiangyang Demonstration Zone), Xiangyang 441000, China

\* Correspondence: jinhuihui@whut.edu.cn (H.J.); wxp122525691@whut.edu.cn (X.W.);  
Tel.: +86-135-4528-4506 (X.W.)

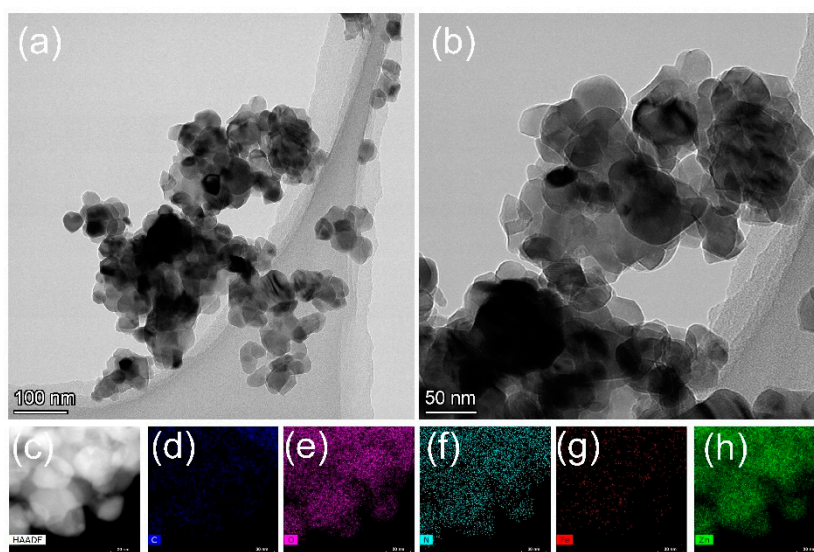

**Figure S1.** (a,b) TEM images of Fe-ZnO@ZIF; (c-h) EDS mapping of Fe-ZnO@ZIF.

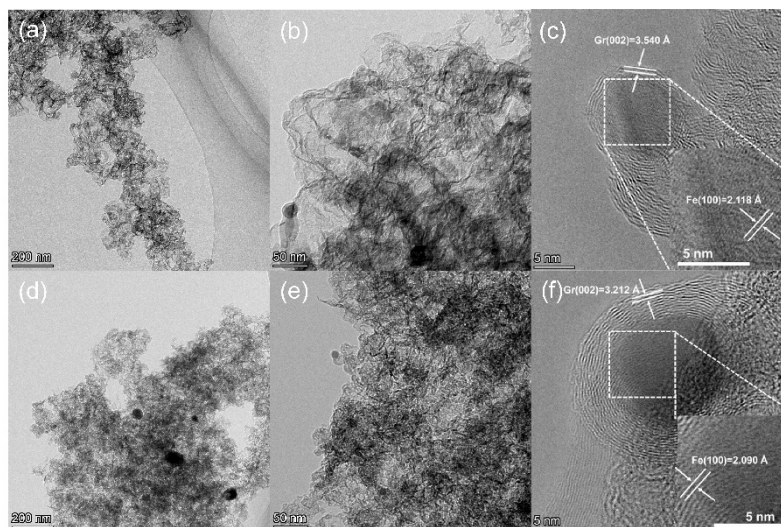

Figure S2. TEM images of (a–c) Fe-N-C@CNTs-700; (d–f) Fe-N-C@CNTs-900.

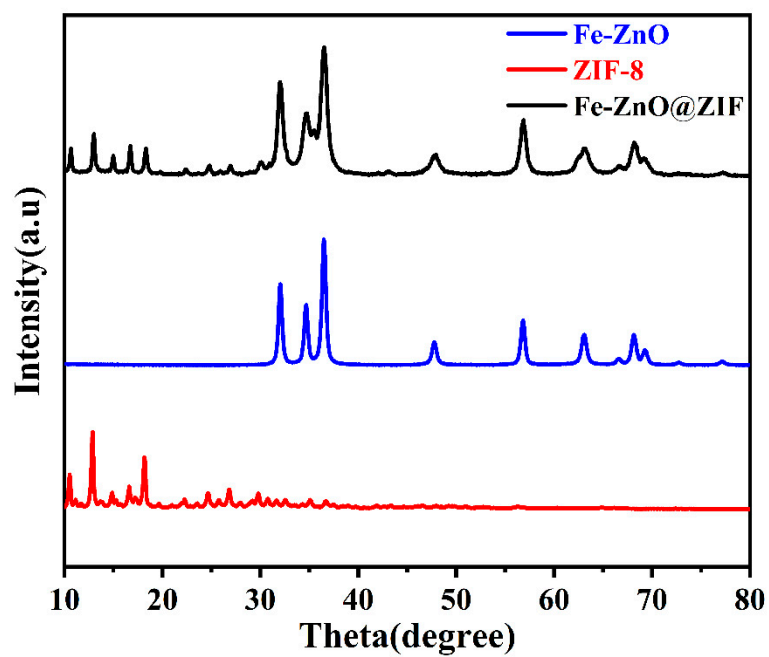

Figure S3. The powdered XRD of ZIF-8, Fe-ZnO@ZIF-8, and Fe-ZnO.

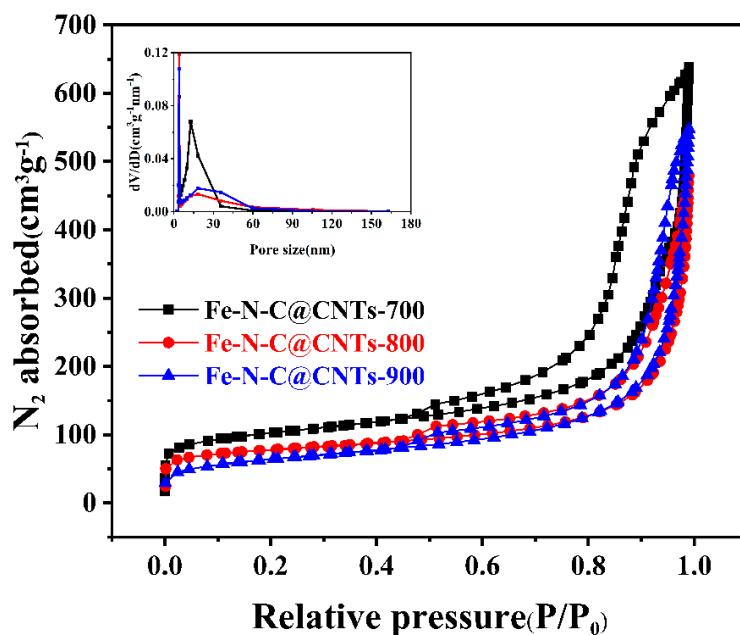

Figure S4. N<sub>2</sub> adsorption-desorption isotherms of Fe-N-C@CNTs-700, 800, 900.

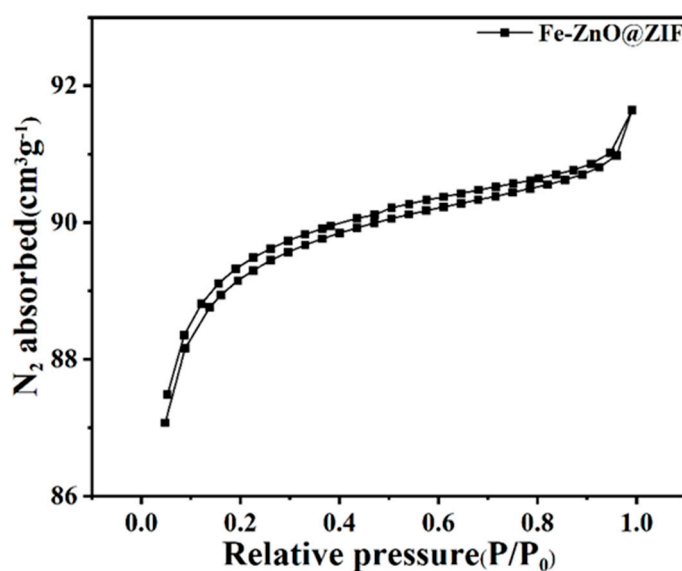

Figure S5. The Nitrogen adsorption-desorption isotherm curve of Fe-ZnO@ZIF-8.

Table S1. Comparisons of microwave-absorption performance between our work and related literatures.

| Compositon  | RL (dB) | EAB (GHz) | Thickness (mm) | Filling Ratio (wt.%) | Reference |
|-------------|---------|-----------|----------------|----------------------|-----------|
| Fe-N/C      | -30.98  | 5.04      | 1.7            | 33.3                 | [46]      |
| Co/N/C      | -27.2   | 5.97      | 6.68           | 15                   | [47]      |
| CoNC/CNTs   | -44.6   | 1.7       | 4.7            | 15                   | [48]      |
| Ni@C@ZnO    | -55.8   | 4.1       | 2.5            | 25                   | [49]      |
| CoFe@C      | -44.1   | 5.2       | 5.8            | 40                   | [50]      |
| Fe-N-C@CNTs | -58.5   | 5.68      | 4.8            | 20                   | This work |
